# Supplementary material for: Innovation of Imine Metal Chelates as Corrosion Inhibitors at Different Media: A Collective Study
Source: MDPI journal article supplement (doi:10.3390/ijms23169360), 2022-08-19
Supplement: s1 [file s1]

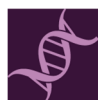

Supporting Data

# Innovation of Imine Metal Chelates as Corrosion Inhibitors at Different Media: A Collective Study

Hany M. Abd El-Lateef <sup>1,2,\*</sup>, Tarek El-Dabea<sup>2</sup>, Mai M. Khalaf <sup>1,2</sup> and Ahmed M. Abu-Dief <sup>2,3,\*</sup>

<sup>1</sup>Department of Chemistry, College of Science, King Faisal University, P.O. Box 400 Al-Ahsa 31982, Saudi Arabia

<sup>2</sup>Chemistry Department, Faculty of Science, Sohag University, Sohag-82534, Egypt

<sup>3</sup>Chemistry Department, College of Science, Taibah University, Madinah, P.O. Box 344, Saudi Arabia

\* Correspondence: authors: hmahmed@kfu.edu.sa, hany\_shubra@science.sohag.edu.eg (H. M. Abd El-Lateef), amamohammed@taibahu.edu.sa; ahmed\_benzoic@yahoo.com (A. M. Abu-Dief).

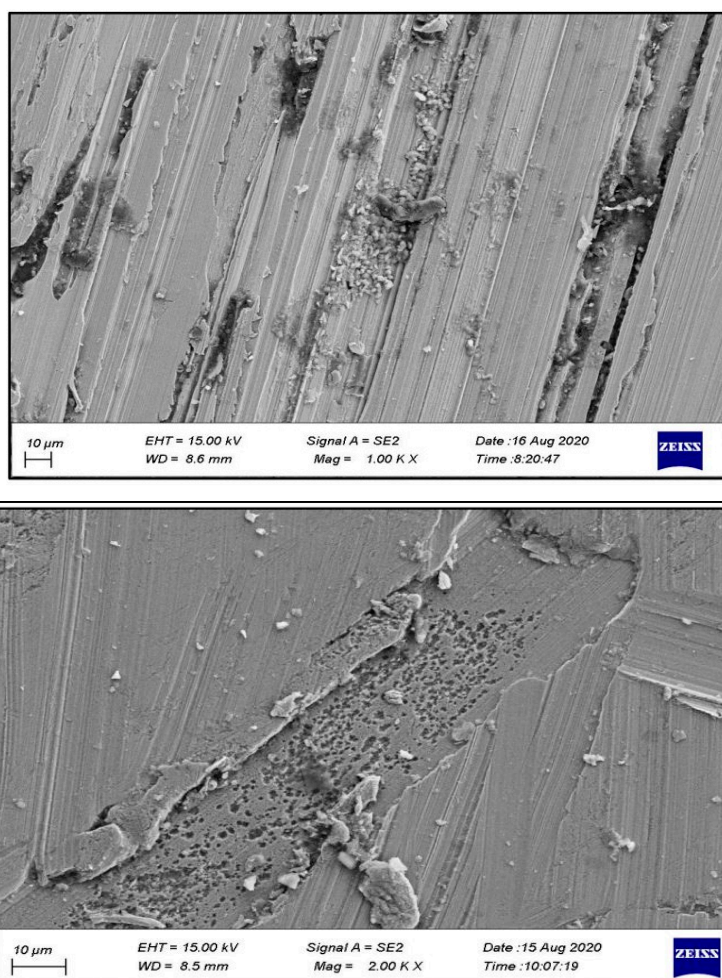

**Figure. S1:** Mild steel sample photos in acidic solutions without inhibitor. [57].

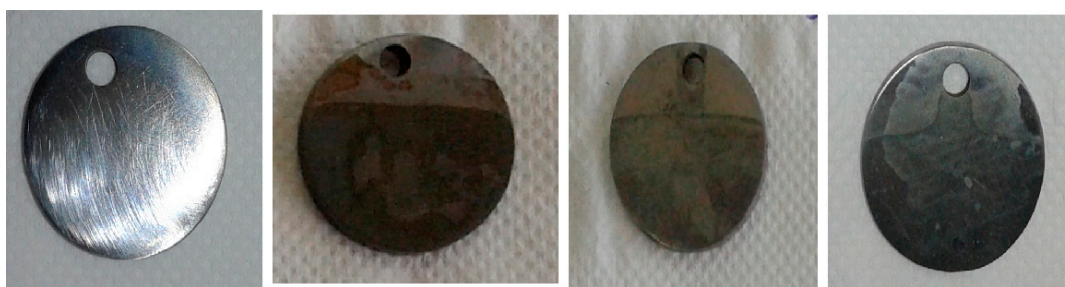

**Figure S2:** The mild steel macrostructure for the standard sample and the examined complexes [Cd(II) and UO<sub>2</sub>(II)]. [62]

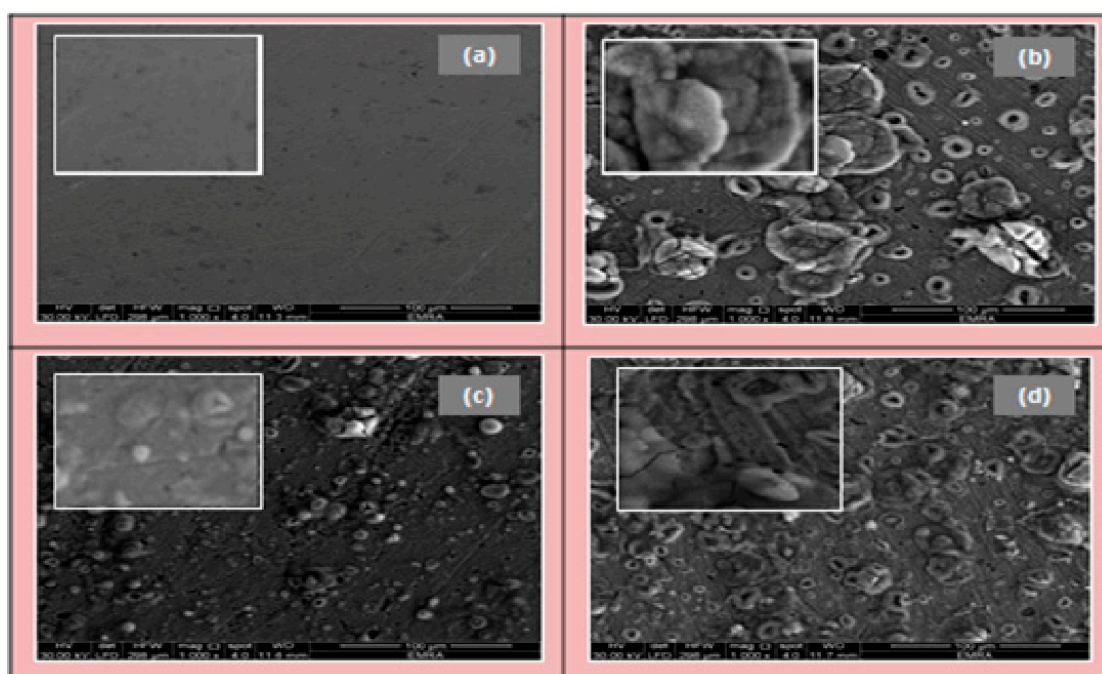

**Figure S3:** Micrographs of mild steel samples for a glossy mild steel surface that has not been treated (a), in the presence of inhibitor, following absorption in 1 M HCl solution (b), following absorption in 1 M HCl solution containing 500 ppm Cd(II) chelate (c) and through absorption in a 1 M HCl solution with 500 ppm UO<sub>2</sub>(II) chelate (d). [62]

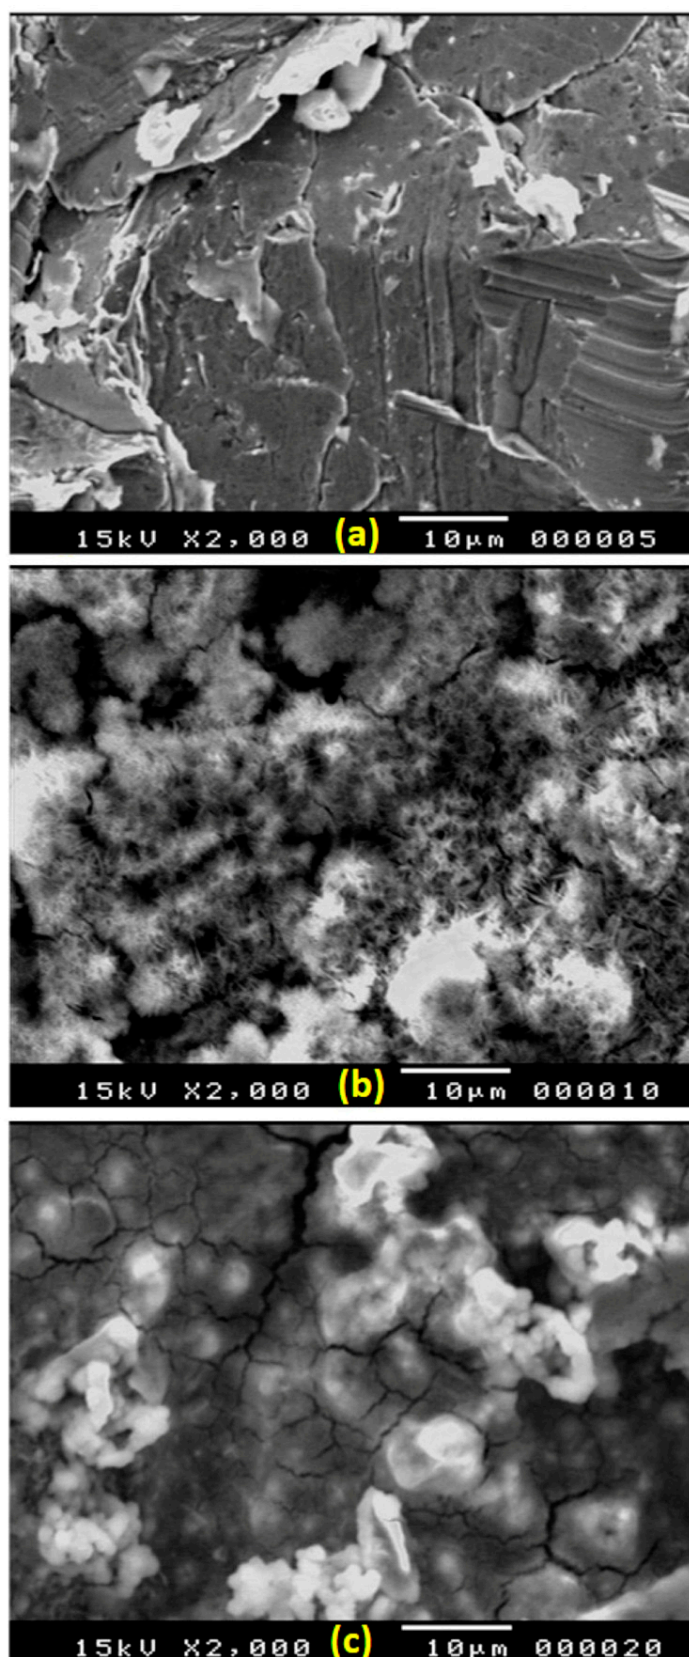

**Figure S4:** SEM studies of: (a) refined mild steel, (b) oilfield formation water absorbed mild steel (Blank) & (c) mild steel in oilfield formation water + 500 ppm STSC + 5 ppm  $\text{Cu}^{2+}$ . [67]

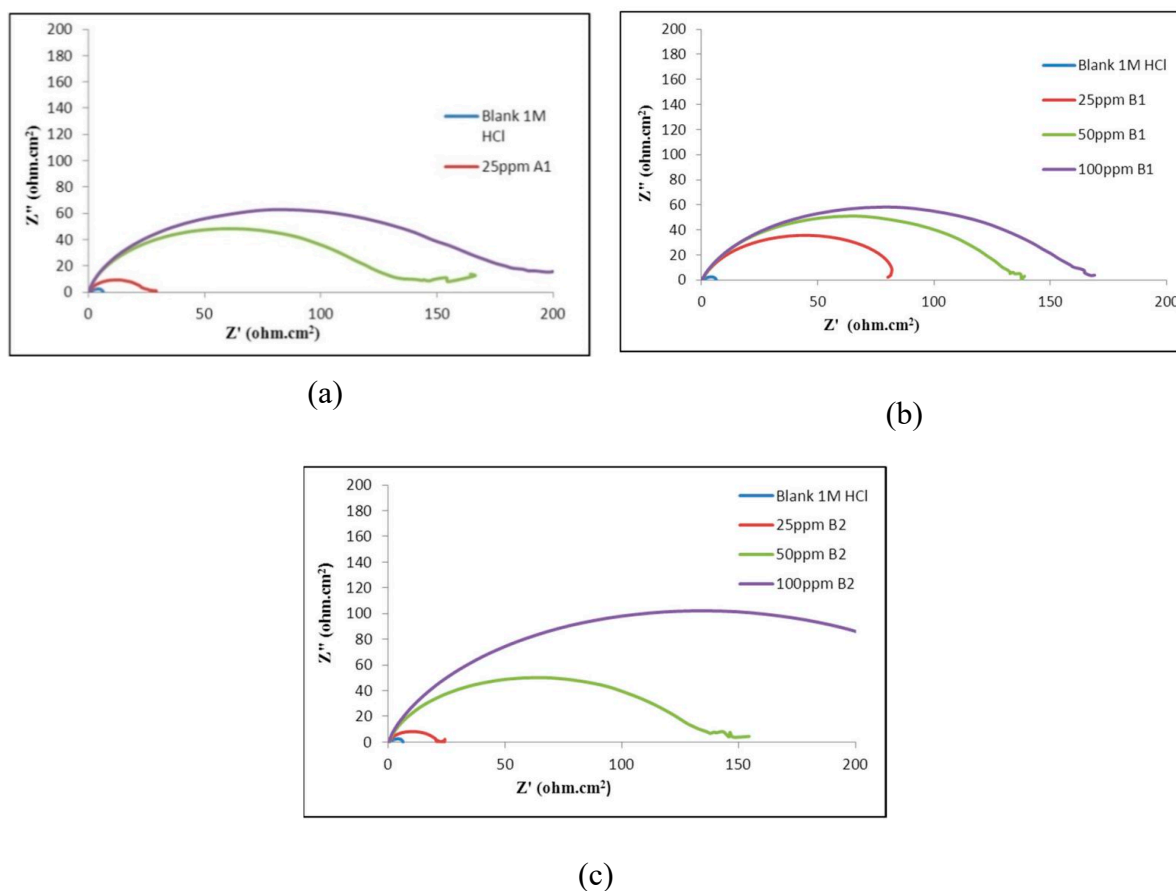

**Figure. S5:** Nyquist charts of mild steel corrosion in 1M Hydrochloric acid with and without the various concentrations levels of (a) A1 [N- (benzylcarbamoithieryl) benzamide], (b) B1 [N- (benzylcarbamoithieryl) benzamide] copper(II) acetate & (c) B2 [N-(benzylcarbamoithieryl) benzamide] nickel(II) acetate. [70]

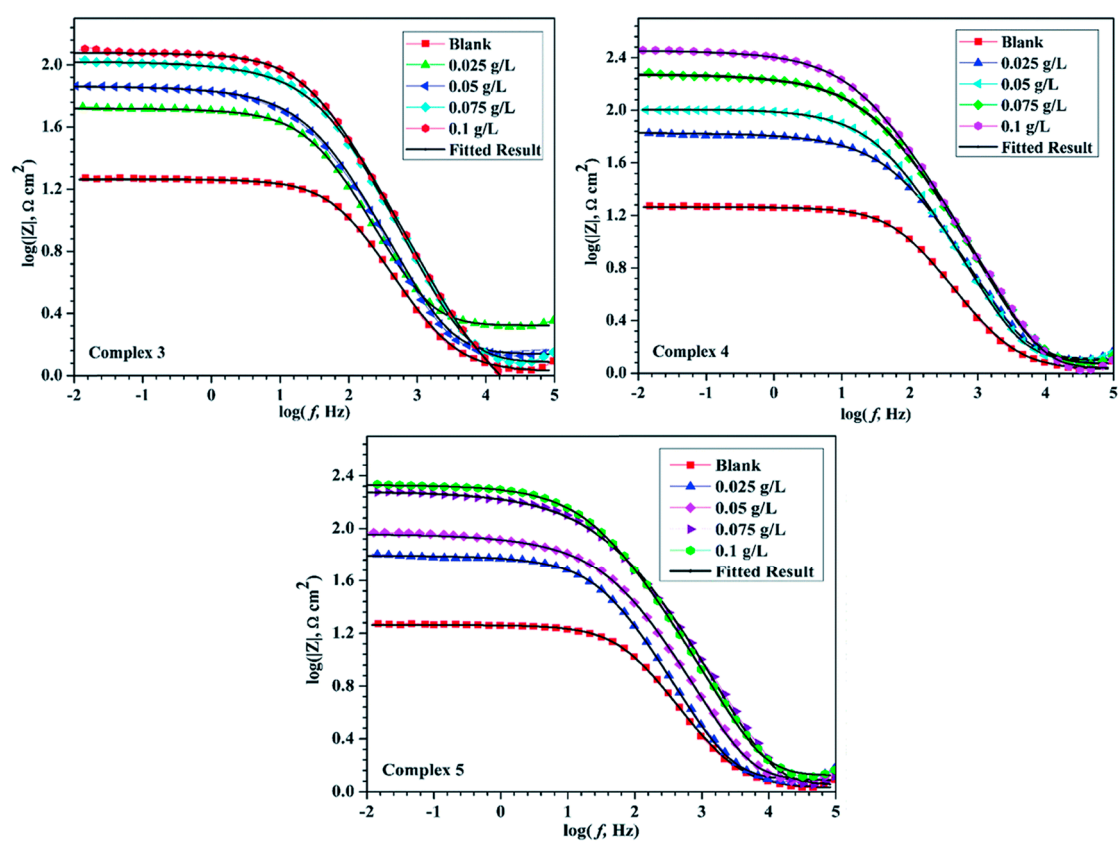

**Figure. S6:** Bode chart of mild steel in 15% Hydrochloric acid in absence and presence of inhibitor doses.  
[78]



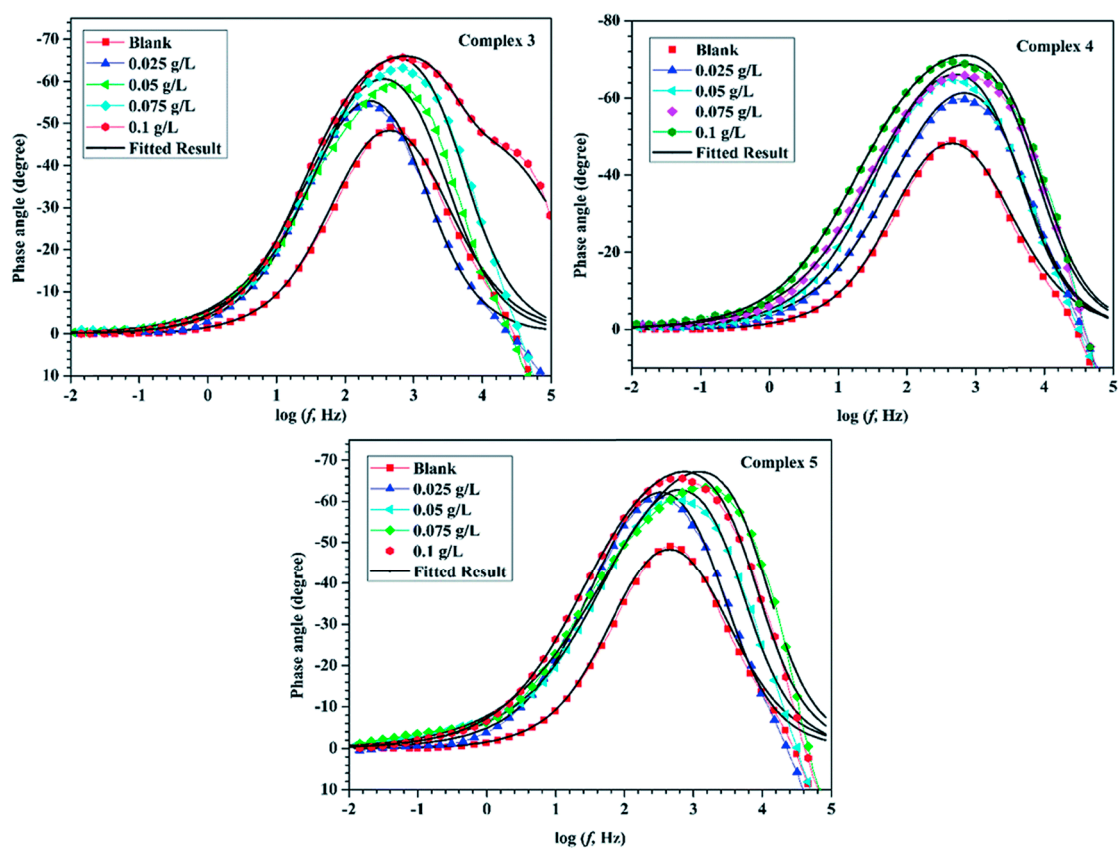

**Figure. S7:** Plots of phase angles of mild steel in 15% Hydrochloric acid in absence and presence varied inhibitor doses. [78]

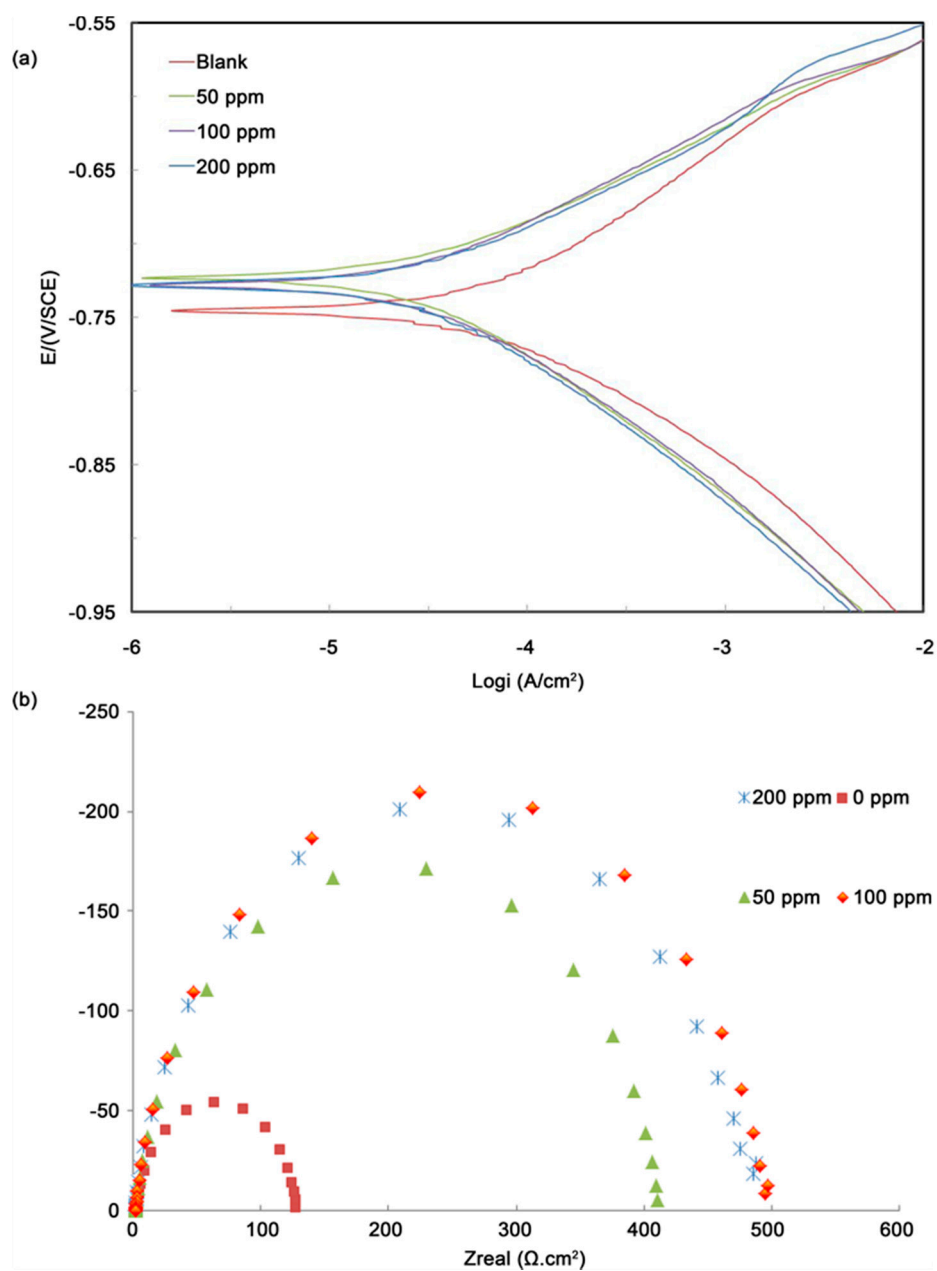

**Figure. S8:** (a) Polarization curves and (b) Nyquist plot of 316 L S S in 0.1 M Sulphuric acid solution with and without different dosages. [84]

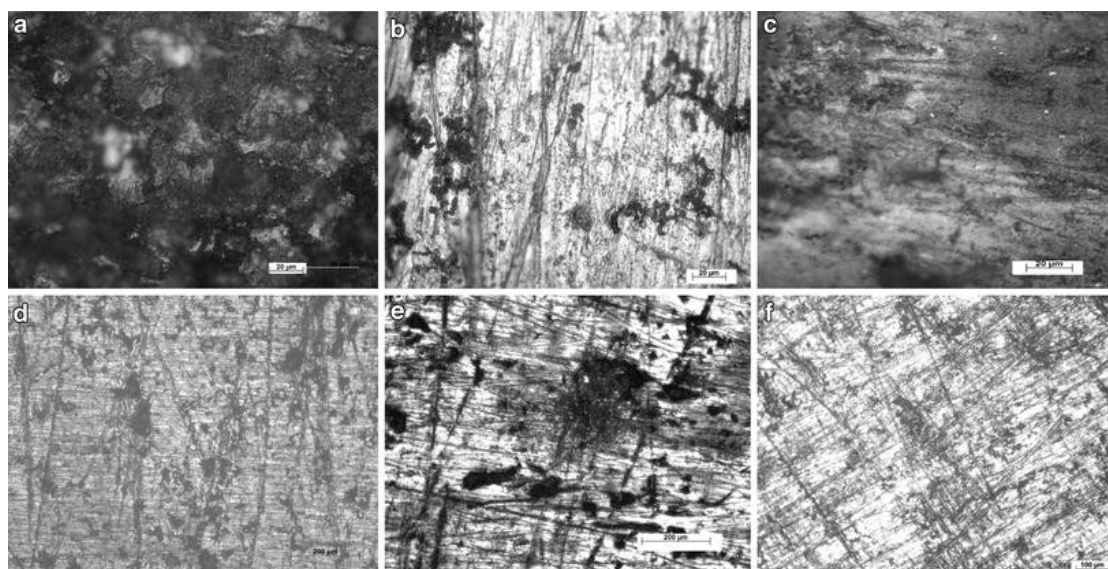

**Figure. S9:** Optical microscope images of carbon steel sample in acid medium without inhibitor (a), and with inhibitors H<sub>2</sub>L (b) & Co<sub>2</sub>L(H<sub>2</sub>O)<sub>2</sub>(Cl)<sub>2</sub>·2H<sub>2</sub>O (c), Ni<sub>2</sub>L(H<sub>2</sub>O)<sub>2</sub>(Cl)<sub>2</sub>·2H<sub>2</sub>O (d), Cu<sub>2</sub>L(H<sub>2</sub>O)<sub>2</sub>(Cl)<sub>2</sub>·2H<sub>2</sub>O (e), and Zn<sub>2</sub>L(H<sub>2</sub>O)<sub>2</sub>(Cl)<sub>2</sub>·2H<sub>2</sub>O (f). [86]

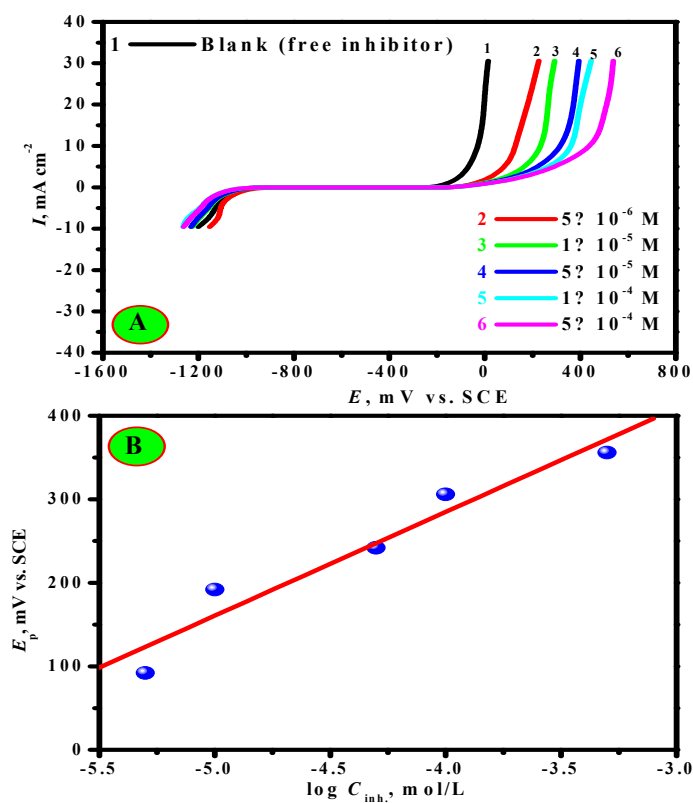

**Figure. S10:** PAP digrams of carbon steel in 1.0 N HCl solutions with and without various doses of NABSF at 30 °C (A) and a relation between  $E_p$  &  $\log C_{inh}$  (B) [95]



## References

- [64] Nassar, A. M., Hassan, A. M., & Shoeib, M. A. Synthesis, characterization and anticorrosion studies of new homobimetallic Co (II), Ni (II), Cu (II), and Zn (II) Schiff base complexes. *J Bio Tribo Corros*, **2015**, 1(3), 1-16.
- [78] Jaafar, W. A., & Saeed, R. S. Synthesis, characterization and corrosion inhibition study of new heterocyclic compounds and schiff base with [Co (II), Ni (II), Cu (II) and Hg (II)] complexes. *Syst. Rev. Pharm*, **2020**, 11(10), 134-143.
- [83] Taha, R. H., Gaber, G. A., Mohamed, L. Z., & Ghanem, W. A. Corrosion inhibition of two schiff base complexes on the mild steel in 1M HCl solution. *Egy J Chem*, **2019**, 62(1), 367-381.
- [88] Mahross, M. H., Efil, K., El-Nasr, T. A., & Abbas, O. A. Experimental and Theoretical Study on Corrosion Inhibition of Mild Steel in Oilfield Formation Water Using Some Schiff Base Metal Complexes. *J Elect Sci Tech*, **2017**, 8(3), 222-235.
- [91] Kassim, K., Nordin, N. A., Zulkifli, N. Z., & Hashim, N. Z. N. Synthesis of Ni (II) and Cu (II) complexes with N-(benzylcarbamothioyl) benzamide as corrosion inhibitors for mild steel in 1M HCl. In *AIP Con Proc*, **2017**, 1904(1), 020024.
- [93] Baboukani, A. R., Sharifi, E., Akhavan, S., & Saatchi, A. Co complexes as a corrosion inhibitor for 316 l stainless steel in H<sub>2</sub>SO<sub>4</sub> solution. *J Mat Sci Chem Eng*, **2016**, 4(9), 28-35.
- [94] Das, M., Biswas, A., Kundu, B. K., Mobin, S. M., Udayabhanu, G., & Mukhopadhyay, S. (). Targeted synthesis of cadmium (II) Schiff base complexes towards corrosion inhibition on mild steel. *RSC advances*, **2017**, 7(77), 48569-48585.
- [101] Abd El-Lateef, H. M., Desoky M. Mohamad, A., Shehata, M. R., & Abu-Dief, A. M. Targeted synthesis of two iron (III) tetradentate dibasic chelating Schiff base complexes towards inhibition of acidic induced steel corrosion: Empirical and DFT insights. *Appl Organomet Chem*, **2022**, e6718. <https://doi.org/10.1002/aoc.6718>
